1 **Th22 cells are a major contributor to the mycobacterial CD4+ T cell**  
2 **response and are depleted during HIV infection**

3

4

5 Rubina Bunjun<sup>1,2</sup>, Fidilia M.A. Omondi<sup>1,2</sup>, Mohau S. Makatsa<sup>1,2</sup>, Tracey L. Müller<sup>1,2</sup>, Caryn  
6 S.L. Prentice<sup>1,2</sup>, Robert J. Wilkinson<sup>1,3,4,5,6</sup>, Catherine Riou<sup>1,2,3</sup>, Wendy A. Burgers<sup>1,2,3</sup>

7

8

9 <sup>1</sup>Institute of Infectious Disease and Molecular Medicine, <sup>2</sup>Department of Pathology, and  
10 <sup>3</sup>Wellcome Centre for Infectious Diseases Research in Africa, University of Cape Town,  
11 Observatory, 7925, South Africa; <sup>4</sup>Department of Medicine, University of Cape Town,  
12 Observatory, 7925, South Africa; <sup>5</sup>Department of Medicine, Imperial College London, W12  
13 0NN, United Kingdom; <sup>6</sup>The Francis Crick Institute, London NW1 1AT, United Kingdom.

14

15 **FOOTNOTES:**

16 **Funding:** This project is part of the EDCTP2 programme supported by the European Union  
17 (EU)'s Horizon 2020 programme (Training and Mobility Action TMA2016SF-1535 –  
18 CaTCH-22, to WAB). Additionally, WAB was funded by the SAMRC, NRF SA (92755)  
19 and NHLS Trust (2016-2DEV04). RB was a Carnegie Corporation Fellow and received PhD  
20 funding from the University of Cape Town and the Canada Africa Prevention Trials (CAPT)  
21 Network. CR is funded by the EDCTP2 programme supported by the EU's Horizon 2020  
22 programme (Training and Mobility Action TMA2017SF-1951– TB-SPEC, to CR). RJW is  
23 supported by the Wellcome Trust (203135 and 104803), NIH (U01 AI115940), the Francis  
24 Crick Institute (Cancer Research UK, MRC UK and Wellcome FC0010218), NRF SA  
25 (96841) and SAMRC (SHIP). The funders had no role in study design, data collection and  
26 analysis, decision to publish, or preparation of the manuscript. The views expressed are those  
27 of the authors, and the funders are not responsible for any use that may be made of the  
28 information contained herein.

29

30 **Correspondence:** Wendy Burgers, Institute of Infectious Disease and Molecular Medicine,  
31 Faculty of Health Sciences, University of Cape Town, Observatory 7925, South Africa  
32 ([wendy.burgers@uct.ac.za](mailto:wendy.burgers@uct.ac.za)).

33

34 **Potential conflicts of interest:** The authors of this manuscript do not have commercial or  
35 other associations that pose a conflict of interest.

36

37 **Manuscript information:**

38 Running title: HIV depletes mycobacteria-specific Th22 cells

39 Abstract: 250/250 words; Figures: 6, Tables: 1; Supplementary Figures: 3

40

41 **ABSTRACT**

42 HIV-1 infection substantially increases the risk of developing tuberculosis (TB). Some  
43 mechanisms, such as defects in the Th1 response to *Mycobacterium tuberculosis* (*M.tb*) in  
44 HIV-infected individuals have been widely reported. However, Th1-independent mechanisms  
45 also contribute to protection against TB. To identify a broader spectrum of defects in TB  
46 immunity during HIV infection, we examined IL-17 and IL-22 production in response to  
47 mycobacterial antigens in individuals with latent TB infection (LTBI) and HIV co-infection.  
48 Upon stimulating with mycobacterial antigens, we observed a distinct CD4+ T helper lineage  
49 producing IL-22 in the absence of IL-17 and IFN- $\gamma$ . Th22 cells were present at high  
50 frequencies in response to mycobacterial antigens in blood and contributed up to 50% to the  
51 CD4+ T cell response to mycobacteria, comparable in magnitude to the IFN- $\gamma$  Th1 response  
52 (median 0.91% and 0.55%, respectively). Phenotypic characterization of Th22 cells revealed  
53 that their memory differentiation was similar to *M.tb*-specific Th1 cells (*i.e.* predominantly  
54 early-differentiated CD45RO+CD27+ phenotype). Moreover, CCR6 and CXCR3 expression  
55 profiles of Th22 cells were similar to Th17 cells, while their CCR4 and CCR10 expression  
56 patterns displayed an intermediate phenotype between Th1 and Th17 cells. Strikingly,  
57 mycobacterial IL-22 responses were three-fold lower in HIV-infected individuals compared  
58 to uninfected individuals, and the magnitude of responses correlated inversely with HIV viral  
59 load. These data provide important insights into mycobacteria-specific T helper subsets and  
60 suggest a potential role for IL-22 in protection against TB during HIV infection. Further  
61 studies are needed to fully elucidate the role of IL-22 in protective TB immunity.

62 **INTRODUCTION**

63

64 Tuberculosis (TB) is the leading cause of death from an infectious agent, claiming 1.6  
65 million lives in 2017, with 10 million new TB cases that year (1). This considerable burden  
66 of disease, along with a host of challenges in diagnosing, treating and managing TB,  
67 emphasize its significance as a global health threat. Although TB is curable and successful  
68 treatment outcomes are typically >80%, cure is achieved less frequently with drug  
69 resistant TB (56%), and outcomes during HIV co-infection are worse (2). Importantly,  
70 cure does not lead to protection from re-infection or disease reactivation. HIV-infected  
71 persons are particularly vulnerable to developing TB, with an estimated increase in risk of  
72 20-30 fold (3). The widespread introduction of ART has coincided with only a modest  
73 decline in TB in regions most affected by HIV (4), as TB risk still remains elevated in  
74 HIV-infected persons compared to HIV-uninfected persons, despite immune  
75 reconstitution (5).

76 The development of an effective TB vaccine is hampered by a lack of  
77 understanding of correlates of immune protection (6), particularly the functional and  
78 phenotypic characteristics of effector T cells that mediate control of *Mycobacterium*  
79 *tuberculosis* (*M.tb*), and how this immune response might be balanced by  
80 immunoregulatory T cell populations to limit inflammation and avoid pathology. The  
81 recent demonstration of the first candidate TB vaccine capable of protecting adults from  
82 pulmonary TB with an efficacy of 54% (7), provides the field with an opportunity to  
83 define correlates of vaccine protection, and has the potential to uncover unique insights  
84 into immunological control of TB.

85 TB and HIV co-infection presents us with a further prospect to improve our  
86 understanding of the mechanisms of immune control of *M.tb*, by identifying how HIV

87 renders the immune response to *M.tb* defective, leading to increased risk of TB disease.  
88 CD4+ T cells and specifically the Th1/IFN- $\gamma$  response to *M.tb* are critical for protective  
89 immunity to TB (8). Most studies of HIV-TB co-infection focus on Th1 immunity, and have  
90 demonstrated depletion or dysfunction of *M.tb*-specific Th1 responses in both blood (9–12)  
91 and the airways (13–15) during HIV infection.

92 However, there is evidence of a role for IFN- $\gamma$ -independent mechanisms in immune  
93 control of TB (16) that may also contribute to, or synergize with, Th1 responses to TB.  
94 Recently, we characterized the profile of Th subsets specific for *M.tb* using lineage-defining  
95 transcription factors, revealing the broad spectrum of Th subsets involved in mycobacterial  
96 immunity, demonstrating that the inflammatory environment associated with HIV infection  
97 skewed these profiles (17). Th17 cells form part of this spectrum of *M.tb*-specific Th  
98 responses, and are believed to play an important role in immune protection from TB (18).  
99 Suppression of Th17-related genes was recently shown to be associated with progression  
100 to TB disease in *M.tb*-infected adolescents (19). In line with this, *M.tb*-specific IL-17-  
101 producing CD4+ T cells were significantly depleted in HIV-infected individuals from a  
102 TB-endemic area, compared to HIV-uninfected individuals (20).

103 Whilst IL-17 responses in *M.tb* immunity have been relatively well-studied (21–26),  
104 IL-22 responses have been overlooked in part due to their classification as a Th17 cytokine  
105 from studies in mice (27). In humans, however, IL-22 is produced by a distinct subset of  
106 CD4+ T cells (28–30), termed “Th22 cells”. IL-22 is a member of the IL-10 family of  
107 cytokines, and functions mainly to protect tissues from inflammation and infection, through  
108 stimulating proliferation and repair, and the production of antimicrobial peptides (31). Until  
109 recently, IL-22 was thought to be dispensable for control of *M.tb*, since deficiency or  
110 neutralization of IL-22 in mice had no effect control of *M.tb* using lab strains H37Rv and  
111 Erdman (32–35). However, the recent observation that IL-22 deficient mice infected with a

112 clinical strain of *M.tb* (HN878) had an impaired ability to control *M.tb*, leading to increased  
113 bacterial burden and greater dissemination of infection (36), has triggered renewed interest in  
114 IL-22 and its role in TB control.

115         Given the paucity of data on *M.tb*-specific IL-22 CD4+ responses, and the knowledge  
116 that HIV infection results in the preferential targeting and depletion of Th22 cells (37), we  
117 sought to characterize HIV-induced defects in adaptive immunity to *M.tb*, with a focus on  
118 Th22 cells. Our findings highlight the large contribution IL-22 makes to the human CD4+ T  
119 cell response to TB (equivalent in magnitude to the IFN- $\gamma$  response), with *M.tb*-specific Th22  
120 cells being entirely distinct from Th1 and Th17 cells. Moreover, we show for the first time  
121 that *M.tb*-specific Th22 cells are depleted during HIV co-infection to a similar extent as Th1  
122 responses. These findings emphasize the potential importance of this understudied CD4+ Th  
123 subset in TB immunity, and suggest that the loss of *M.tb*-specific Th22 cells may contribute  
124 to the increased risk of TB during HIV infection.

125

126

## 127 **MATERIALS AND METHODS**

128

### 129 **Study Participants**

130 Volunteers were recruited from Cape Town, South Africa, and fell within the following  
131 groups: ART naive HIV-seropositive persons with CD4 counts  $>400$  cells/mm<sup>3</sup> (n=25;  
132 median age 31; 96% female) and HIV-seronegative persons (n=25; median age 23; 60%  
133 female). HIV RNA levels were determined using an Abbott m2000 RealTime HIV-1 assay  
134 and blood CD4 counts by the Flow-CARE™ PLG CD4 test. All volunteers were TB  
135 sensitized based on a positive IFN- $\gamma$  release assay (IGRA; Quantiferon, Cellestis), and active  
136 TB was excluded, based on symptoms and radiological evidence.

137 Healthy donors were recruited from the University of Cape Town, South Africa.  
138 Participants were >18 years of age, weighed >55 kg, did not have any chronic disease, did  
139 not use immunosuppressive medication and were not pregnant or lactating. These studies  
140 were approved by the Research Ethics Committee of the University of Cape Town  
141 (158/2010, 279/2012). All participants provided written, informed consent.

142

### 143 **Whole blood stimulation assays**

144 Venous blood was collected and processed within 4 hours. Whole blood stimulation was  
145 performed as previously described (38) with the following antigens: Bacillus Calmette-  
146 Guerin (BCG; MOI of 4; SSI), Purified Protein Derivative (PPD) of *M. tuberculosis*  
147 (20µg/ml; Statens Serum Institute), ESAT-6 and CFP-10 peptide pools (4µg/ml), *M.*  
148 *tuberculosis* whole cell lysate (10µg/ml; BEI Resources) or PMA and Ionomycin (0.01µg/ml  
149 and 1µg/ml, respectively, Sigma), in the presence of anti-CD28 and anti-CD49d (1µg /ml  
150 each). Unstimulated cells were incubated with co-stimulatory antibodies only. Brefeldin A  
151 (BFA, 10µg/ml; Sigma) was added 7 hours after the onset of stimulation, and five hours after  
152 BFA addition, cells were either stained immediately, or red blood cells were lysed, the cell  
153 pellet stained with a violet viability dye, ViViD (Molecular Probes), fixed with FACS Lyse  
154 (BD Biosciences) and cryopreserved in 10% DMSO in FCS.

155

### 156 **Antibody Staining and Flow Cytometry**

157 Cryopreserved or freshly stimulated whole blood was stained as previously described (15).  
158 For intracellular markers, cells were permeabilized with Perm/Wash buffer (BD Biosciences)  
159 and then stained intracellularly. Cells were stained with the following antibodies: CD3 APC-  
160 H7 (SK7; BD Biosciences), CD4 PE-Cy5.5 (S3.5; Invitrogen), CD4 ECD (T4; Beckman  
161 Coulter), CD8 QDot705 (3B5; Invitrogen), CD45RO ECD (UCLH1; Beckman Coulter),

162 CD27 PE-Cy5 (1A4CD27; Beckman Coulter), CXCR3 PE-Cy7 (1C6/CXCR3; BD  
163 Biosciences), CCR6 BV605 (11A9; BD Biosciences), CCR4 BV510 (L291H4; Biolegend),  
164 CCR10 PE (1B5; BD Biosciences), KLRG1 PE-vio770 (REA261; Miltenyi Biotec), CD26  
165 FITC (M-A261; BD Biosciences), IFN- $\gamma$  Alexa700 (B27; BD Biosciences), IL-17 Alexa488  
166 (N49-653; BD Biosciences), IL-17 FITC (BL-168; Biolegend), IL-22 PE (22URTI; e-  
167 Bioscience) or IL-22 eFluor450 (22URTI; e-Bioscience). Cells were acquired on a BD  
168 Fortessa using FACSDiva software and data analysed using FlowJo (TreeStar) and Pestle and  
169 Spice (39). A positive cytokine response was defined as twice background and a net response  
170  $>0.025\%$ , and all data are reported after background subtraction. A minimum of 30 cytokine-  
171 positive events was required for memory or chemokine receptor phenotyping.

172

### 173 **Statistical Analysis**

174 Statistical analyses were performed using Prism 7 (GraphPad). Non-parametric tests (Mann-  
175 Whitney U test, Wilcoxon matched pairs test and Spearman Rank test) were used for all  
176 comparisons. Kruskal-Wallis with Dunn's post-test was used for multiple comparisons. A p  
177 value of  $<0.05$  was considered significant.

178

179

## 180 **RESULTS**

181

### 182 **IL-22 responses are a major component of the CD4+ mycobacterial response**

183 We examined CD4+ T cell cytokine profiles in response to a range of mycobacterial antigens  
184 in 25 healthy, HIV-uninfected persons sensitized by *M. tuberculosis* (*M.tb* IGRA+; **Table 1**).

185 **Figure 1A** shows representative flow cytometry plots of IFN- $\gamma$ , IL-22 and IL-17 CD4+  
186 responses to *M. bovis* BCG, *M.tb* PPD and a pool of ESAT-6 and CFP-10 peptides from



187 *M.tb.* As expected, CD4<sup>+</sup> T cell IFN- $\gamma$  responses to BCG were detected in all donors (median  
188 0.55%, IQR: 0.28-1.46%; **Figure 1B**). Remarkably, IL-22 accounted for the greatest  
189 proportion of the CD4<sup>+</sup> response to BCG (median 0.91%, IQR: 0.52-1.24%). In fact, the  
190 frequency of IL-22<sup>+</sup> cells was greater than IFN- $\gamma$  in 75% of participants. IL-17 CD4<sup>+</sup>  
191 responses to BCG were significantly lower (median 0.11%, IQR: 0.06-1.66%) than both IFN-  
192  $\gamma$  (p=0.007) and IL-22 (p=0.0008). Stimulation with *M.tb* PPD led to the detection of a  
193 similar IFN- $\gamma$  response as BCG (median 0.74%), with comparatively lower frequencies of  
194 PPD-specific IL-22<sup>+</sup> CD4<sup>+</sup> T cells (median 0.21%; p=0.02) and IL-17<sup>+</sup> cells (median 0%;  
195 p<0.0001) (**Figure 1B**). The ESAT-6/CFP-10 response was dominated by IFN- $\gamma$  (median  
196 0.07%), with low to undetectable IL-17 and IL-22 responses (medians of 0%). Taken  
197 together, these data demonstrate that different mycobacterial antigen preparations result in  
198 detection of different CD4<sup>+</sup> T cell cytokine profiles. Of note, IL-22 made a substantial  
199 contribution to the anti-mycobacterial CD4<sup>+</sup> response, with responses equivalent to or greater  
200 than the IFN- $\gamma$  response to BCG.

201

### 202 **Most CD4<sup>+</sup> T cells producing IL-22 do not make IFN- $\gamma$ and IL-17**

203 We next focused on the high magnitude IL-22 response detected to BCG, to further  
204 characterize IL-22 CD4<sup>+</sup> responses and their relationship with IFN- $\gamma$  and IL-17. There was a  
205 highly significant positive correlation between IFN- $\gamma$  and IL-22 responses to BCG (p<0.0001,  
206 r=0.830; **Figure 2A**). The frequency of IL-17<sup>+</sup> CD4<sup>+</sup> T cells also correlated with both IFN- $\gamma$   
207 and IL-22 production (p=0.039, r=0.424 and p=0.005, r=0.559, respectively; data not shown).  
208 Given these associations between IFN- $\gamma$ , IL-22 and IL-17, we examined the co-expression  
209 patterns of the cytokines following BCG stimulation (**Figure 2B**). The majority of BCG-  
210 responding CD4<sup>+</sup> T cells produced only IL-22 (median 47%; IQR: 36.6-59.6), whilst CD4<sup>+</sup>  
211 cells secreting IFN- $\gamma$ -alone made up a median of 37% (IQR: 27.1-47.4). There was minimal

212 co-expression of IL-22 with both IL-17 (median 0.5%) and with IFN- $\gamma$  (median 6.4%). When  
213 examining all CD4<sup>+</sup> T cells producing IL-22, a median of 78% produced IL-22 alone (IQR:  
214 71.1-89.2%), while 14% and 1.5% co-expressed IFN- $\gamma$  or IL-17, respectively (data not  
215 shown). We also investigated IL-22 production in combination with other cytokines and  
216 found low or negligible co-expression with TNF- $\alpha$ , IL-2 and IL-21 (medians 0.3%, 0.5% and  
217 3%, respectively, data not shown). Our data reveal that the large proportion of BCG-specific  
218 IL-22 was produced predominantly by CD4<sup>+</sup> T cells secreting IL-22 in the absence of either  
219 IL-17 or IFN- $\gamma$ , consistent with being a distinct ‘Th22’ lineage (28–30).

220

### 221 **Phenotypic characteristics of mycobacteria-specific IL-22-producing CD4<sup>+</sup> T cells**

222 In order to characterize the Th22 subset in more detail, we determined the memory  
223 differentiation profile of mycobacteria-specific Th22 cells (*i.e.* those producing IL-22 alone)  
224 compared to cells producing only IFN- $\gamma$  or IL-17. **Figure 3A** shows representative flow  
225 cytometry plots of CD45RO and CD27 expression on total CD4<sup>+</sup> cells with overlays of  
226 BCG-specific cytokine-producing CD4<sup>+</sup> T cells (IFN- $\gamma$ , IL-22 or IL-17 alone). The memory  
227 profile of BCG-specific CD4<sup>+</sup> T cells was comparable, regardless of their cytokine secretion  
228 profile, with approximately 79% having an early differentiated phenotype (ED:  
229 CD45RO<sup>+</sup>CD27<sup>+</sup>, comprising central and transitional memory cells). Of the remaining cells,  
230 a median of ~17% were late differentiated (LD: CD45RO<sup>+</sup>CD27<sup>-</sup>, comprising effector  
231 memory and intermediate cells), with few terminally differentiated (TD: CD45RO<sup>-</sup>CD27<sup>-</sup>;  
232 ~0.3%) or naïve-like (CD45RO<sup>-</sup>CD27<sup>+</sup>; ~2 %) cells (**Figure 3B**). Thus, CD4<sup>+</sup> T cells  
233 producing IFN- $\gamma$ , IL-22 or IL-17 shared a similar memory differentiation phenotype.

234 To further characterize the phenotype of the different cytokine-producing subsets, we  
235 examined chemokine receptor expression profiles on CD4<sup>+</sup> cells producing IFN- $\gamma$ , IL-22 or  
236 IL-17. For these studies, we stimulated whole blood with *M.tb* whole cell lysate. To ensure

237 that we were measuring similar cytokine responses, we compared IFN- $\gamma$ , IL-22 and IL-17  
238 induced by each antigen and found highly comparable frequencies of CD4+ T cell responses  
239 in the same donors (**Supplemental Figure S1**). **Figure 4A** shows representative flow  
240 cytometry plots of *M.tb*-specific CD4+ T cell production of IFN- $\gamma$ , IL-22 and IL-17 overlaid  
241 onto chemokine receptor expression profiles (CXCR3, CCR6, CCR4 and CCR10). Whilst a  
242 majority of IFN- $\gamma$ -producing cells expressed CXCR3 (median 61.5%), a sizable fraction also  
243 expressed CCR6 (median 54.5%), with a low proportion expressing CCR4 (median 4.1%)  
244 and negligible CCR10 (median 0.5%; **Figure 4B**). In contrast, CD4+ cells producing IL-22  
245 were almost all CCR6 positive (median 94.7%), and compared to cells producing IFN- $\gamma$ ,  
246 significantly fewer expressed CXCR3 (median 27.7%), and significantly more expressed  
247 CCR4 and CCR10 (median 23.3% and 2.7%, respectively). Th17 cells (IL-17+) shared  
248 comparable expression profiles for CCR6 and CXCR3 (medians 96.1% and 17.2%,  
249 respectively), but a higher proportion expressed CCR4 (median 50.8%) and CCR10 (median  
250 5.8%) compared to Th22 cells. Of note, cells co-producing IFN- $\gamma$  and IL-22 had a similarly  
251 high expression of CCR6 as Th22 and Th17 cells, but were otherwise intermediate between  
252 IFN- $\gamma$ + and Th22 for the remaining chemokine receptors (**Supplemental Figure S2A**). These  
253 findings demonstrate distinct patterns of chemokine receptor expression on different  
254 cytokine-producing subsets. These data are consistent with previous descriptions (28, 30), but  
255 also highlight the substantial overlap in chemokine receptor expression between T helper  
256 subsets producing distinct cytokines.

257 We also investigated the homing potential of *M.tb*-specific CD4+ Th subsets using  
258 KLRG1 and CD26. Killer cell lectin-like receptor G1 (KLRG1)-expressing cells appear to be  
259 retained within lung blood vasculature, while KLRG1<sup>-</sup> cells migrate to the lung parenchyma  
260 (40). Dipeptidyl peptidase IV (CD26) is involved in enzymatic chemokine modification that  
261 enhances T cell migration (41, 42). Expression of these markers was significantly different

262 between Th subsets (**Supplementary Figure S2B**). Th22 cells were characterized by a near  
263 absence of KLRG1 expression compared to Th1 and Th17 cells. In contrast, 50% of Th22  
264 cells expressed CD26, compared to a median of 34% of Th1 cells and 11% of Th17 cells  
265 (**Supplemental Figure S2B**). These data suggest that *M.tb*-specific Th22 are endowed with a  
266 distinct homing potential compare to Th1 and Th17 cells.

267

### 268 **The effect of HIV infection on the Th22 response to mycobacteria**

269 Th1 responses to *M.tb* are impaired or reduced during HIV infection (3). However, little is  
270 known about the effect of HIV co-infection on the Th22 response to *M.tb*. Hence, we  
271 examined IFN- $\gamma$ , IL-22 and IL-17 responses to BCG and PPD in 25 HIV-infected individuals  
272 with a median CD4 count of 619 cells/mm<sup>3</sup> (IQR: 532.5-782) and a median plasma viral load  
273 of 6.38 x10<sup>3</sup> copies/ml (IQR: 3.55-16.45 x10<sup>3</sup>; **Table 1**). Consistent with previous reports, the  
274 frequency of *M.tb*-specific CD4+ T cells producing IFN- $\gamma$  was significantly lower in HIV-  
275 infected participants compared to uninfected participants in response to BCG (p=0.0004,  
276 medians 0.12% and 0.55%, respectively; **Figure 5A**). Notably, the IL-22 response to BCG  
277 was also lower in HIV-infected individuals, to a similar degree as the IFN- $\gamma$  response  
278 (p=0.0005; medians 0.28% and 0.91%, respectively). Additionally, IL-17 responses were also  
279 significantly lower in HIV-infected individuals in response to BCG compared to the HIV-  
280 uninfected group (p<0.0001, medians 0% and 0.11%, respectively). After adjusting for CD4  
281 count, these differences became even more evident (**Figure 5B**), despite the relatively well-  
282 preserved CD4+ T cell numbers in our HIV-infected cohort. HIV-infected participants had 8-  
283 fold (p<0.0001) and 3-fold (p=0.0003) fewer CD4+ T cells producing IFN- $\gamma$  or IL-22,  
284 respectively, compared to uninfected participants. There were also fewer cells producing IL-  
285 17 in HIV-infected individuals (median 0; p<0.0001). Similar results were obtained for IFN- $\gamma$   
286 and IL-22 in response to PPD (**Supplemental Figure S3A and B**). Overall, HIV-infected

287 participants had lower *M.tb*-specific IFN- $\gamma$ , IL-22 and IL-17 responses. Whilst the decrease in  
288 *M.tb*-specific IFN- $\gamma$  and IL-17 responses during HIV infection has been reported, we report  
289 here a striking loss of *M.tb*-specific CD4<sup>+</sup> T cells producing IL-22.

290 To further investigate the impact of HIV on BCG-specific Th22 responses, we  
291 measured the amount of IL-22 produced per cell, using median fluorescent intensity (MFI).  
292 The MFI of IL-22 was significantly lower in HIV-infected individuals compared to  
293 uninfected individuals ( $p < 0.0001$ ; medians 4169 and 6215, respectively; **Figure 5C**),  
294 whereas no differences in the MFI of IFN- $\gamma$  and IL-17 was observed. This suggests that HIV  
295 may have a unique effect on Th22 cells in response to BCG. However, we found no  
296 differences in the MFI of any cytokines produced in response to PPD (**Supplemental Figure**  
297 **S3C**).

298 To investigate whether the lower cytokine responses to mycobacterial antigens in  
299 HIV-infected individuals related to clinical parameters, the association between IFN- $\gamma$ , IL-22  
300 and IL-17 responses and CD4 count or plasma viral load was examined. We observed a  
301 significant positive correlation between both the IFN- $\gamma$  and IL-22 response to BCG and CD4  
302 count ( $p = 0.04$ ,  $r = 0.43$ ; and  $p = 0.004$ ,  $r = 0.57$ , respectively; **Figure 6A**). Likewise, in response  
303 to PPD, IFN- $\gamma$  ( $p = 0.03$ ,  $r = 0.45$ ) and IL-22 ( $p = 0.004$ ,  $r = 0.57$ ) correlated directly with CD4  
304 count (data not shown). This suggests that the decrease in these responses could be a  
305 consequence of overall CD4<sup>+</sup> T cell depletion, despite the relatively narrow CD4 count range  
306 and modest CD4 decreases in our study (84% of participants had CD4 counts  $> 500$   
307 cells/mm<sup>3</sup>). No association between the frequency of IL-17 and CD4 count was observed for  
308 either BCG (**Figure 6A**, bottom panel) or PPD (data not shown). Finally, there were no  
309 significant associations between plasma viral load and IFN- $\gamma$  or Th17 responses to BCG;  
310 **Figure 6B**) or any cytokine in response to PPD (data not shown). However, the frequency of

311 Th22 cells responding to BCG was significantly inversely correlated with plasma viral load  
312 ( $p=0.006$ ,  $r=-0.54$ , **Figure 6B**, middle panel).

313 Overall, we demonstrate the detrimental effect of HIV infection on CD4<sup>+</sup> T helper  
314 subsets in response to mycobacteria. In particular, the Th22 subset exhibited both a decrease  
315 in the magnitude of the response to mycobacteria, and a defect in IL-22 production on a per  
316 cell basis. Furthermore, unlike the other cytokine-producing subsets examined (Th1 and  
317 Th17), the frequency of Th22 cells correlated inversely with HIV viral load, suggesting a  
318 direct relationship between HIV infection and the loss of Th22 cells specific for  
319 mycobacteria.

320

321

## 322 **DISCUSSION**

323 Th1/IFN- $\gamma$  responses are needed for an effective response to TB (8), however a range of  
324 immune mechanisms beyond Th1 immunity may also contribute to protection from TB (6).  
325 Since HIV-infected individuals are considerably more susceptible to TB disease (3), key  
326 components required for effective immune control of *M.tb* are likely to be defective in these  
327 individuals, and we sought to identify these. In addition to IFN- $\gamma$ /Th1 immunity, this study  
328 examined IL-17 and IL-22 responses to mycobacteria in *M.tb*-sensitized, HIV-infected and  
329 uninfected individuals. Consistent with previous studies, we identified distinct populations of  
330 CD4<sup>+</sup> T cells expressing IFN- $\gamma$ , IL-17 or IL-22 in response to mycobacterial antigens (43,  
331 44). The IL-22 response was unexpectedly abundant, contributing up to 50% of the  
332 mycobacterial response measured using these three cytokines, and the source was a distinct  
333 subset of CD4<sup>+</sup> T cells producing IL-22 alone. Importantly, IL-22 response was impaired in  
334 HIV-infected individuals in both magnitude and function, suggesting that depletion of this  
335 subset may contribute to TB risk.

336 IL-22 has classically been characterized as a Th17-related cytokine, since in mice it is  
337 co-secreted with IL-17 and has overlapping functions with IL-17 (27). However, IL-22 is a  
338 member of the IL-10 family (45), and in humans IL-22 is not co-expressed with IL-17 (28–  
339 30). Consequently, ‘Th22’ cells were proposed as a novel CD4<sup>+</sup> T helper cell lineage in  
340 humans, with shared but distinct features and functions compared to Th17 cells. To date, the  
341 role of IL-17 in *M.tb* immunity has been well-studied (21–24, 26). Here, we found that IL-17  
342 responses made only a modest contribution to the total mycobacterial response in *M.tb*-  
343 exposed individuals, consistent with previous reports (20, 43). In contrast, we detected ample  
344 mycobacteria-specific IL-22 production from CD4<sup>+</sup> T cells in the absence of IL-17 (and IFN-  
345  $\gamma$ ), consistent with a distinct Th22 subset and in agreement with earlier observations in LTBI  
346 and TB disease (43, 46). Phenotypic profiling demonstrated that whilst their memory  
347 differentiation phenotype was similar to that of Th1 and Th17 cells, the bulk of Th22 cells  
348 expressed CCR6, with expression frequencies of CXCR3, CCR4 and CCR10 intermediate  
349 between Th1 and Th17 cells, somewhat consistent with published reports (28, 30). *M.tb*-  
350 specific Th22 cells were also characterized by higher CD26 and absent KLRG1 expression  
351 compared to both Th1 and Th17 cells. Altogether, these characteristics emphasize the shared  
352 and unique features of mycobacteria-specific Th22 cells relative to Th1 and Th17 cells,  
353 which may relate to distinct homing capabilities.

354 The previously unappreciated, sizeable contribution Th22 cells make to the  
355 mycobacterial response prompts the question of whether Th22 responses play a role in  
356 protective immunity against *M.tb*. Previous studies demonstrated that deficiency or  
357 neutralization of IL-22 in mice did not affect control of laboratory strains of *M.tb* (H37Rv  
358 and Erdman) (32–35). However, renewed interest in IL-22 has been garnered since the  
359 observation that IL-22 deficient mice infected with a hypervirulent clinical strain of *M.tb*  
360 (HN878) have an impaired ability to control the infection, resulting in both increased

361 bacterial burden and greater dissemination of infection (36). Additional evidence from a  
362 range of models suggest that IL-22 may indeed participate in TB immunity. IL-22 has been  
363 found at sites of TB disease; soluble IL-22 and IL-22 transcripts were elevated in the airways,  
364 lung tissue, granuloma, and in pleural and pericardial effusions during TB disease (43, 46–  
365 50). Along with IFN- $\gamma$ , IL-22 was one of the strongest genes upregulated in bovine TB (51),  
366 and gene expression signatures revealed that IFN- $\gamma$  and IL-22 were the dominant correlates of  
367 protection from bovine TB in blood in BCG-vaccinated cattle (52). Human genetic studies  
368 demonstrated the association between increased susceptibility to TB and a single nucleotide  
369 polymorphism in the IL-22 promoter that decreased IL-22 expression (50).

370 If IL-22 is involved in TB immunity, how might it mediate a protective function? IL-  
371 22 functions as a key regulator of tissue-specific antimicrobial immunity (31). The receptor  
372 for IL-22 is a heterodimer consisting of the IL-10R2 and the IL-22R, and expression is  
373 primarily restricted to non-hematopoietic cells, particularly epithelial cells in the skin,  
374 digestive tract and respiratory tract (31). IL-22 has been shown to be essential for mediating  
375 protective immunity to a range of extracellular and intracellular bacteria, such as *Klebsiella*  
376 and *Chlamydia* in the lung and *Citrobacter* in the intestine (53–56). Neutralization of IL-22  
377 led to bacterial dissemination, exacerbated pathology, and lower Th1 and Th17 responses in  
378 the lung (55). The protective role at barrier sites appears to be mediated by three distinct  
379 functions, namely; maintenance of barrier integrity by promotion of epithelial homeostasis,  
380 stimulating epithelial proliferation and preventing apoptosis, as well as enhancing mucin  
381 production and tight junction formation; inducing antimicrobial peptides such as  $\beta$ -defensins;  
382 and regulating chemokine secretion from epithelial cells to co-ordinate recruitment of  
383 immune cells, such as neutrophils, to inflamed tissue (27, 29, 55, 57). Indeed, Treerat and  
384 colleagues demonstrated that the TB-protective role of IL-22 resulted from the secretion of  
385 S100 and Reg3 $\gamma$  from epithelial cells, and induction of CCL2 that mediated macrophage



386 recruitment to the infected lung (36). It is worth noting that several studies have  
387 independently documented IL-22R expression on *M.tb*-infected monocyte-derived  
388 macrophages (MDMs), as well as macrophages in TB granulomas in humans and non-human  
389 primates (36, 58, 59). Consistent with these findings, IL-22 from CD4+ T cells and innate  
390 cells, as well as recombinant IL-22, reduced mycobacterial replication in MDMs by  
391 improving phagolysosome fusion (36, 58–60). These data suggest that a direct effector  
392 function for IL-22 in limiting mycobacterial growth cannot be ruled out.

393         HIV-infected individuals remain one of the most vulnerable populations at risk of TB  
394 (3). The early depletion of *M.tb*-specific Th1 responses, considered fundamental to TB  
395 immunity, has been reported during HIV infection (9, 10). Here, we investigated the relative  
396 effect of HIV on Th22 and Th17 responses to mycobacteria compared to Th1 responses. An  
397 important and novel finding from our study was that the mycobacteria-specific Th22  
398 response was depleted during HIV infection, to a similar extent as Th1/IFN- $\gamma$  responses.  
399 Several studies have described a global and preferential loss of Th22 and Th17 cells during  
400 HIV/SIV infection, leading to mucosal gut damage and systemic immune activation, driving  
401 HIV disease progression (37, 61–64). The CCR6+CD4+ T cell subset (within which all  
402 Th22 and Th17 cells reside) is more permissive to HIV infection and replication, and is  
403 enriched for HIV DNA (65–67). Elevated expression of HIV co-receptors CCR5 and  
404 CXCR4 has been reported on CCR6+CD4+ T cells, which could facilitate HIV entry  
405 (68). In addition, post-entry mechanisms appear to create a more permissive cellular  
406 environment for HIV replication in CCR6-expressing cells, demonstrated by specific  
407 transcriptional signatures favoring HIV replication (69–71). We report here that higher  
408 HIV plasma viral load correlates with lower frequencies of Th22 cells specific for  
409 mycobacteria, consistent with a mechanism of direct, preferential infection of Th22 cells  
410 by HIV. Overall, multiple mechanisms may contribute to the loss of Th22, Th17 and Th1

411 subsets specific for *M.tb* (72, 73), and their combined depletion may contribute to TB risk  
412 during HIV infection.

413 Our new findings add to a growing body of evidence in support of a role for IL-22 in  
414 protective immunity to TB. However, a number of questions remain unanswered. Does IL-22  
415 contribute to protective immunity to TB, or only during infection with specific clinical  
416 strains, or during HIV infection, when multiple immunological defects manifest? Does IL-22  
417 assume a direct effector or indirect regulatory role in immunity to TB, or both? Does the  
418 inflammatory context dictate whether IL-22 might be beneficial to the host or pathological  
419 (74)? Ultimately, will it be necessary to induce Th22 responses for a TB vaccine to be  
420 effective? Notwithstanding these gaps in our knowledge, our study highlights the substantial  
421 contribution that Th22 cells make to mycobacterial immunity, and the importance of further  
422 elucidating the role of IL-22 in the control of *M.tb* infection and disease.

423

424

#### 425 **ACKNOWLEDGEMENTS**

426 We thank the study participants for providing samples and for their time and commitment to  
427 the study, and to the clinical staff at the Ubuntu HIV-TB clinic. We thank Dr Shaun Barnabas  
428 and Rene Goliath for phlebotomy. We thank Mrs Kathryn Norman for administrative  
429 assistance. We are grateful to BEI Resources, NIAID, NIH, for the following reagent:  
430 *Mycobacterium tuberculosis*, Strain H37Rv, Whole Cell Lysate, NR-14822.

431

432

#### 433 **AUTHOR CONTRIBUTIONS**

434 Conceived and designed the experiments: WAB, CR and RJW. Performed the experiments:  
435 RB, FMAO, MSM, TLM and CSLP. Analyzed the data: RB, FMAO, SMM and WAB. Wrote  
436 the paper: RB and WAB. All authors approved the final manuscript.

437 **REFERENCES**

- 438 1. World Health Organization. 2018. *Global tuberculosis report 2018*.
- 439 2. El-Sadr, W. M., D. C. Perlman, E. Denning, J. P. Matts, and D. L. Cohn. 2001. A Review  
440 of Efficacy Studies of 6-Month Short-Course Therapy for Tuberculosis among Patients  
441 Infected with Human Immunodeficiency Virus: Differences in Study Outcomes. *Clin. Infect.*  
442 *Dis.* 32: 623–632.
- 443 3. Esmail, H., C. Riou, E. du Bruyn, R. P.-J. Lai, Y. X. R. Harley, G. Meintjes, K. A.  
444 Wilkinson, and R. J. Wilkinson. 2018. The Immune Response to *Mycobacterium*  
445 *tuberculosis* in HIV-1-Coinfected Persons. *Annu. Rev. Immunol.* 36: 1–36.
- 446 4. GBD. 2018. The global burden of tuberculosis: results from the Global Burden of Disease  
447 Study 2015. *Lancet Infect. Dis.* 18: 261–284.
- 448 5. Lawn, S. D., L. Myer, D. Edwards, L.-G. G. Bekker, and R. Wood. 2009. Short-term and  
449 long-term risk of tuberculosis associated with CD4 cell recovery during antiretroviral therapy  
450 in South Africa. *AIDS* 23: 1717–1725.
- 451 6. Sakai, S., K. D. Mayer-Barber, and D. L. Barber. 2014. Defining features of protective  
452 CD4 T cell responses to *Mycobacterium tuberculosis*. *Curr. Opin. Immunol.* 29: 137–142.
- 453 7. Van Der Meeren, O., M. Hatherill, V. Nduba, R. J. Wilkinson, M. Muyoyeta, E. Van  
454 Brakel, H. M. Ayles, G. Henostroza, F. Thienemann, T. J. Scriba, A. Diacon, G. L. Blatner,  
455 M.-A. Demoitié, M. Tameris, M. Malahleha, J. C. Innes, E. Hellström, N. Martinson, T.  
456 Singh, E. J. Akite, A. Khaton Azam, A. Bollaerts, A. M. Ginsberg, T. G. Evans, P. Gillard,  
457 and D. R. Tait. 2018. Phase 2b Controlled Trial of M72/AS01 E Vaccine to Prevent  
458 Tuberculosis. *N. Engl. J. Med.* 379: 1621–1634.
- 459 8. O’Garra, A., P. S. Redford, F. W. McNab, C. I. Bloom, R. J. Wilkinson, and M. P. R.  
460 Berry. 2013. The immune response in tuberculosis. *Annu. Rev. Immunol.* 31: 475–527.
- 461 9. Geldmacher, C., A. Schuetz, N. Ngwenyama, J. P. Casazza, E. Sanga, E. Saathoff, C.

- 462 Boehme, S. Geis, L. Maboko, M. Singh, F. Minja, A. Meyerhans, R. A. Koup, and M.  
463 Hoelscher. 2008. Early depletion of *Mycobacterium tuberculosis*-specific T helper 1 cell  
464 responses after HIV-1 infection. *J. Infect. Dis.* 198: 1590–8.
- 465 10. Geldmacher, C., N. Ngwenyama, A. Schuetz, C. Petrovas, K. Reither, E. J. Heeregrave, J.  
466 P. Casazza, D. R. Ambrozak, M. Louder, W. Ampofo, G. Pollakis, B. Hill, E. Sanga, E.  
467 Saathoff, L. Maboko, M. Roederer, W. A. Paxton, M. Hoelscher, and R. A. Koup. 2010.  
468 Preferential infection and depletion of *Mycobacterium tuberculosis*-specific CD4 T cells after  
469 HIV-1 infection. *J. Exp. Med.* 207: 2869–81.
- 470 11. Day, C. L., D. A. Abrahams, L. D. Harris, M. van Rooyen, L. Stone, M. de Kock, and W.  
471 A. Hanekom. 2017. HIV-1 Infection Is Associated with Depletion and Functional Impairment  
472 of *Mycobacterium tuberculosis*-Specific CD4 T Cells in Individuals with Latent  
473 Tuberculosis Infection. *J. Immunol.* 199: 2069–2080.
- 474 12. Strickland, N., T. L. Müller, N. Berkowitz, R. Goliath, M. N. Carrington, R. J. Wilkinson,  
475 W. A. Burgers, and C. Riou. 2017. Characterization of *Mycobacterium tuberculosis*- Specific  
476 Cells Using MHC Class II Tetramers Reveals Phenotypic Differences Related to HIV  
477 Infection and Tuberculosis Disease. *J. Immunol.* 199: 2440–2450.
- 478 13. Kalsdorf, B., T. Scriba, K. Wood, C. L. Day, K. Dheda, R. Dawson, W. A. Hanekom, C.  
479 Lange, and R. J. Wilkinson. 2009. HIV-1 infection impairs the bronchoalveolar T-cell  
480 response to mycobacteria. *Am. J. Respir. Crit. Care Med.* 180: 1262–1270.
- 481 14. Jambo, K. C., E. Sepako, D. G. Fullerton, D. Mzinza, S. Glennie, A. K. Wright, R. S.  
482 Heyderman, and S. B. Gordon. 2011. Bronchoalveolar CD4+ T cell responses to respiratory  
483 antigens are impaired in HIV-infected adults. *Thorax* 66: 375–82.
- 484 15. Bunjun, R., C. Riou, A. P. Soares, N. Thawer, T. L. Müller, A. Kiravu, Z. Ginbot, T. Oni,  
485 R. Goliath, B. Kalsdorf, F. von Groote-Bidlingmaier, W. Hanekom, G. Walzl, R. J.  
486 Wilkinson, and W. A. Burgers. 2017. Effect of HIV on the Frequency and Number of

- 487 *Mycobacterium tuberculosis*-Specific CD4+ T Cells in Blood and Airways During Latent *M.*  
488 *tuberculosis* Infection. *J. Infect. Dis.* 216: 1550–1560.
- 489 16. Gallegos, A. M., J. W. J. van Heijst, M. Samstein, X. Su, E. G. Pamer, and M. S.  
490 Glickman. 2011. A gamma interferon independent mechanism of CD4 T cell mediated  
491 control of *M. tuberculosis* infection in vivo. *PLoS Pathog.* 7: e1002052.
- 492 17. Riou, C., N. Strickland, A. P. Soares, B. Corleis, D. S. Kwon, E. J. Wherry, R. J.  
493 Wilkinson, and W. A. Burgers. 2016. HIV Skews the Lineage-Defining Transcriptional  
494 Profile of *Mycobacterium tuberculosis*-Specific CD4 + T Cells. *J. Immunol.* 196: 3006–  
495 3018.
- 496 18. Shen, H., and Z. W. Chen. 2018. The crucial roles of Th17-related cytokines/signal  
497 pathways in *M. tuberculosis* infection. *Cell. Mol. Immunol.* 15: 216–225.
- 498 19. Scriba, T. J., A. Penn-Nicholson, S. Shankar, T. Hraha, E. G. Thompson, D. Sterling, E.  
499 Nemes, F. Darboe, S. Suliman, L. M. Amon, H. Mahomed, M. Erasmus, W. Whatney, J. L.  
500 Johnson, W. H. Boom, M. Hatherill, J. Valvo, M. A. De Groot, U. A. Ochsner, A. Aderem,  
501 W. A. Hanekom, D. E. Zak, and other members of the ACS cohort study team. 2017.  
502 Sequential inflammatory processes define human progression from *M. tuberculosis* infection  
503 to tuberculosis disease. *PLoS Pathog.* 13: e1006687.
- 504 20. Murray, L. W., I. Satti, J. Meyerowitz, M. Jones, C. B. Willberg, J. E. Ussher, D.  
505 Goedhals, J. Hurst, R. E. Phillips, H. McShane, C. van Vuuren, J. Frater, C. van Vuuren, and  
506 J. Frater. 2018. Human Immunodeficiency Virus Infection Impairs Th1 and Th17  
507 *Mycobacterium tuberculosis*-Specific T-Cell Responses. *J. Infect. Dis.* 217: 1782–1792.
- 508 21. Gopal, R., L. Monin, S. Slight, U. Uche, E. Blanchard, B. A. Fallert Junecko, R. Ramos-  
509 Payan, C. L. Stallings, T. A. Reinhart, J. K. Kolls, D. Kaushal, U. Nagarajan, J. Rangel-  
510 Moreno, and S. A. Khader. 2014. Unexpected role for IL-17 in protective immunity against  
511 hypervirulent *Mycobacterium tuberculosis* HN878 infection. *PLoS Pathog.* 10: e1004099.

- 512 22. Gopal, R., Y. Lin, N. Obermajer, S. Slight, N. Nuthalapati, M. Ahmed, P. Kalinski, and S.  
513 A. Khader. 2012. IL-23-dependent IL-17 drives Th1-cell responses following *Mycobacterium*  
514 *bovis* BCG vaccination. *Eur. J. Immunol.* 42: 364–373.
- 515 23. Gopal, R., J. Rangel-Moreno, S. Slight, Y. Lin, H. F. Nawar, B. A. Fallert Junecko, T. A.  
516 Reinhart, J. Kolls, T. D. Randall, T. D. Connell, and S. A. Khader. 2013. Interleukin-17-  
517 dependent CXCL13 mediates mucosal vaccine-induced immunity against tuberculosis.  
518 *Mucosal Immunol.* 6: 972–984.
- 519 24. Khader, S. A., G. K. Bell, J. E. Pearl, J. J. Fountain, J. Rangel-Moreno, G. E. Cilley, F.  
520 Shen, S. M. Eaton, S. L. Gaffen, S. L. Swain, R. M. Locksley, L. Haynes, T. D. Randall, and  
521 A. M. Cooper. 2007. IL-23 and IL-17 in the establishment of protective pulmonary CD4+ T  
522 cell responses after vaccination and during *Mycobacterium tuberculosis* challenge. *Nat.*  
523 *Immunol.* 8: 369–377.
- 524 25. Okamoto Yoshida, Y., M. Umemura, A. Yahagi, R. L. O'Brien, K. Ikuta, K. Kishihara,  
525 H. Hara, S. Nakae, Y. Iwakura, and G. Matsuzaki. 2010. Essential role of IL-17A in the  
526 formation of a mycobacterial infection-induced granuloma in the lung. *J. Immunol.* 184:  
527 4414–22.
- 528 26. Domingo-Gonzalez, R., S. Das, K. L. Griffiths, M. Ahmed, M. Bambouskova, R. Gopal,  
529 S. Gondi, M. Muñoz-Torrico, M. A. Salazar-Lezama, A. Cruz-Lagunas, L. Jiménez-Álvarez,  
530 G. Ramirez-Martinez, R. Espinosa-Soto, T. Sultana, J. Lyons-Weiler, T. A. Reinhart, J.  
531 Arcos, M. de la Luz Garcia-Hernandez, M. A. Mastrangelo, N. Al-Hammadi, R. Townsend,  
532 J.-M. Balada-Llasat, J. B. Torrelles, G. Kaplan, W. Horne, J. K. Kolls, M. N. Artyomov, J.  
533 Rangel-Moreno, J. Zúñiga, and S. A. Khader. 2017. Interleukin-17 limits hypoxia-inducible  
534 factor 1 $\alpha$  and development of hypoxic granulomas during tuberculosis. *JCI insight* 2: 1–20.
- 535 27. Liang, S. C., X.-Y. Tan, D. P. Luxenberg, R. Karim, K. Dunussi-Joannopoulos, M.  
536 Collins, and L. A. Fouser. 2006. Interleukin (IL)-22 and IL-17 are coexpressed by Th17 cells

- 537 and cooperatively enhance expression of antimicrobial peptides. *J. Exp. Med.* 203: 2271–9.
- 538 28. Duhén, T., R. Geiger, D. Jarrossay, A. Lanzavecchia, and F. Sallusto. 2009. Production of  
539 interleukin 22 but not interleukin 17 by a subset of human skin-homing memory T cells. *Nat.*  
540 *Immunol.* 10: 857–63.
- 541 29. Eyerich, S., K. Eyerich, D. Pennino, T. Carbone, F. Nasorri, S. Pallotta, F. Cianfarani, T.  
542 Odorisio, C. Traidl-Hoffmann, H. Behrendt, S. R. Durham, C. B. Schmidt-Weber, and A.  
543 Cavani. 2009. Th22 cells represent a distinct human T cell subset involved in epidermal  
544 immunity and remodeling. *J. Clin. Invest.* 119: 3573–85.
- 545 30. Trifari, S., C. D. Kaplan, E. H. Tran, N. K. Crellin, and H. Spits. 2009. Identification of a  
546 human helper T cell population that has abundant production of interleukin 22 and is distinct  
547 from T(H)-17, T(H)1 and T(H)2 cells. *Nat. Immunol.* 10: 864–71.
- 548 31. Sonnenberg, G. F., L. A. Fouser, and D. Artis. 2011. Border patrol: regulation of  
549 immunity, inflammation and tissue homeostasis at barrier surfaces by IL-22. *Nat. Immunol.*  
550 12: 383–90.
- 551 32. Wilson, M. S., C. G. Feng, D. L. Barber, F. Yarovinsky, A. W. Cheever, A. Sher, M.  
552 Grigg, M. Collins, L. Fouser, and T. A. Wynn. 2010. Redundant and pathogenic roles for IL-  
553 22 in mycobacterial, protozoan, and helminth infections. *J. Immunol.* 184: 4378–90.
- 554 33. Khader, S. A., L. Guglani, J. Rangel-moreno, R. Gopal, a Beth, F. Junecko, J. J.  
555 Fountain, C. Martino, J. E. Pearl, M. M. Tighe, Y. Lin, S. Slight, J. K. Kolls, T. A. Reinhart,  
556 T. D. Randall, A. M. Cooper, and B. A. F. Junecko. 2011. IL-23 is required for long-term  
557 control of *Mycobacterium tuberculosis* and B cell follicle formation in the infected lung. *J.*  
558 *Immunol.* 187: 5402–7.
- 559 34. Behrends, J., J. Renaud, S. Ehlers, and C. Hölscher. 2013. IL-22 is mainly produced by  
560 IFN $\gamma$ -secreting cells but is dispensable for host protection against *Mycobacterium*  
561 *tuberculosis* infection. *PLoS One* 8: e57379.



- 562 35. Segueni, N., E. Tritto, M. L. Bourigault, S. Rose, F. Erard, M. Le Bert, M. Jacobs, F. Di  
563 Padova, D. P. Stiehl, P. Moulin, D. Brees, S. D. Chibout, B. Ryffel, M. Kammüller, and V. F.  
564 Quesniaux. 2016. Controlled *Mycobacterium tuberculosis* infection in mice under treatment  
565 with anti-IL-17A or IL-17F antibodies, in contrast to TNF $\alpha$  neutralization. *Sci. Rep.* 6: 1–17.
- 566 36. Treerat, P., O. Prince, A. Cruz-Lagunas, M. Muñoz-Torrico, M. A. Salazar-Lezama, M.  
567 Selman, B. Fallert-Junecko, T. A. Reinhardt, J. F. Alcorn, D. Kaushal, J. Zuñiga, J. Rangel-  
568 Moreno, J. K. Kolls, and S. A. Khader. 2017. Novel role for IL-22 in protection during  
569 chronic *Mycobacterium tuberculosis* HN878 infection. *Mucosal Immunol.* 10: 1069–1081.
- 570 37. Kim, C. J., A. Nazli, O. L. Rojas, D. Chege, Z. Alidina, S. Huibner, S. Mujib, E. Benko,  
571 C. Kovacs, L. Y. Y. Shin, A. Grin, G. Kandel, M. Loutfy, M. Ostrowski, J. L. Gommerman,  
572 C. Kaushic, and R. Kaul. 2012. A role for mucosal IL-22 production and Th22 cells in HIV-  
573 associated mucosal immunopathogenesis. *Mucosal Immunol.* 5: 670–80.
- 574 38. Hanekom, W. A., J. Hughes, M. Mavinkurve, M. Mendillo, M. Watkins, H. Gamielien,  
575 S. J. Gelderbloem, M. Sidibana, N. Mansoor, V. Davids, R. A. Murray, A. Hawkrige, P. A.  
576 J. Haslett, S. Ress, G. D. Hussey, and G. Kaplan. 2004. Novel application of a whole blood  
577 intracellular cytokine detection assay to quantitate specific T-cell frequency in field studies.  
578 *J. Immunol. Methods* 291: 185–95.
- 579 39. Roederer, M., J. L. Nozzi, and M. C. Nason. 2011. SPICE: exploration and analysis of  
580 post-cytometric complex multivariate datasets. *Cytometry. A* 79: 167–74.
- 581 40. Sakai, S., K. D. Kauffman, J. M. Schenkel, C. C. McBerry, K. D. Mayer-Barber, D.  
582 Masopust, and D. L. Barber. 2014. Cutting Edge: Control of *Mycobacterium tuberculosis*  
583 Infection by a Subset of Lung Parenchyma-Homing CD4 T Cells. *J. Immunol.* 192: 2965–9.
- 584 41. Iwata, S., N. Yamaguchi, Y. Munakata, H. Ikushima, J. F. Lee, O. Hosono, S. F.  
585 Schlossman, and C. Morimoto. 1999. CD26/dipeptidyl peptidase IV differentially regulates  
586 the chemotaxis of T cells and monocytes toward RANTES: Possible mechanism for the

- 587 switch from innate to acquired immune response. *Int. Immunol.* 11: 417–426.
- 588 42. Ikushima, H., Y. Munakata, S. Iwata, K. Ohnuma, S. Kobayashi, N. H. Dang, and C.  
589 Morimoto. 2002. Soluble CD26/dipeptidyl peptidase IV enhances transendothelial migration  
590 via its interaction with mannose 6-phosphate/insulin-like growth factor II receptor. *Cell.*  
591 *Immunol.* 215: 106–110.
- 592 43. Scriba, T. J., B. Kalsdorf, D.-A. Abrahams, F. Isaacs, J. Hofmeister, G. Black, H. Y.  
593 Hassan, R. J. Wilkinson, G. Walzl, S. J. Gelderbloem, H. Mahomed, G. D. Hussey, and W.  
594 A. Hanekom. 2008. Distinct, specific IL-17- and IL-22-producing CD4+ T cell subsets  
595 contribute to the human anti-mycobacterial immune response. *J. Immunol.* 180: 1962–70.
- 596 44. Ye, Z. J., Q. Zhou, M. L. Yuan, R. H. Du, W. B. Yang, X. Z. Xiong, B. Huang, and H. Z.  
597 Shi. 2012. Differentiation and recruitment of IL-22-producing helper T cells stimulated by  
598 pleural mesothelial cells in tuberculous pleurisy. *Am. J. Respir. Crit. Care Med.* 185: 660–  
599 669.
- 600 45. Dumoutier, L., J. Louahed, and J. C. Renauld. 2000. Cloning and characterization of IL-  
601 10-related T cell-derived inducible factor (IL-TIF), a novel cytokine structurally related to  
602 IL-10 and inducible by IL-9. *J. Immunol.* 164: 1814–1819.
- 603 46. Qiu, Y., Y. Huang, J. Chen, D. Qiao, G. Zeng, and J. Cai. 2013. Depletion of IL-22  
604 during culture enhanced antigen-driven IFN- $\gamma$  production by CD4(+)T cells from patients  
605 with active TB. *Immunol. Lett.* 150: 48–53.
- 606 47. Matthews, K., K. A. Wilkinson, B. Kalsdorf, T. Roberts, A. Diacon, G. Walzl, J. Wolske,  
607 M. Ntsekhe, F. Syed, J. Russell, B. M. Mayosi, R. Dawson, K. Dheda, R. J. Wilkinson, W. a  
608 Hanekom, and T. J. Scriba. 2011. Predominance of interleukin-22 over interleukin-17 at the  
609 site of disease in human tuberculosis. *Tuberculosis* 91: 587–93.
- 610 48. Semple, P. L., A. B. Binder, M. Davids, A. Maredza, R. N. van Zyl-Smit, and K. Dheda.  
611 2013. Regulatory T cells attenuate mycobacterial stasis in alveolar and blood-derived

- 612 macrophages from patients with tuberculosis. *Am. J. Respir. Crit. Care Med.* 187: 1249–58.
- 613 49. Yao, S., D. Huang, C. Y. Chen, L. Halliday, G. Zeng, R. C. Wang, and Z. W. Chen. 2010.
- 614 Differentiation, distribution and gammadelta T cell-driven regulation of IL-22-producing T
- 615 cells in tuberculosis. *PLoS Pathog.* 6: e1000789.
- 616 50. Zhang, G., X. Chen, L. Chan, M. Zhang, B. Zhu, L. Wang, X. Zhu, J. Zhang, B. Zhou,
- 617 and J. Wang. 2011. An SNP selection strategy identified IL-22 associating with susceptibility
- 618 to tuberculosis in Chinese. *Sci. Rep.* 1: 1–20.
- 619 51. Aranday-Cortes, E., P. J. Hogarth, D. A. Kaveh, A. O. Whelan, B. Villarreal-Ramos, A.
- 620 Lalvani, and H. M. Vordermeier. 2012. Transcriptional profiling of disease-induced host
- 621 responses in bovine tuberculosis and the identification of potential diagnostic biomarkers.
- 622 *PLoS One* 7: e30626.
- 623 52. Bhuju, S., E. Aranday-Cortes, B. Villarreal-Ramos, Z. Xing, M. Singh, and H. M.
- 624 Vordermeier. 2012. Global Gene Transcriptome Analysis in Vaccinated Cattle Revealed a
- 625 Dominant Role of IL-22 for Protection against Bovine Tuberculosis. *PLoS Pathog.* 8: 8–15.
- 626 53. Basu, R., D. B. O’Quinn, D. J. Silberger, T. R. Schoeb, L. Fouser, W. Ouyang, R. D.
- 627 Hatton, and C. T. Weaver. 2012. Th22 cells are an important source of IL-22 for host
- 628 protection against enteropathogenic bacteria. *Immunity* 37: 1061–75.
- 629 54. Zheng, Y., P. A. Valdez, D. M. Danilenko, Y. Hu, S. M. Sa, Q. Gong, A. R. Abbas, Z.
- 630 Modrusan, N. Ghilardi, F. J. de Sauvage, and W. Ouyang. 2008. Interleukin-22 mediates
- 631 early host defense against attaching and effacing bacterial pathogens. *Nat. Med.* 14: 282–289.
- 632 55. Aujla, S. J., Y. R. Chan, M. Zheng, M. Fei, D. J. Askew, D. A. Pociask, T. A. Reinhart, F.
- 633 McAllister, J. Edeal, K. Gaus, S. Husain, J. L. Kreindler, P. J. Dubin, J. M. Pilewski, M. M.
- 634 Myerburg, C. A. Mason, Y. Iwakura, and J. K. Kolls. 2008. IL-22 mediates mucosal host
- 635 defense against Gram-negative bacterial pneumonia. *Nat. Med.* 14: 275–81.
- 636 56. Peng, Y., and X. Gao. 2014. Interleukin-22 Promotes T Helper 1 (Th1)/Th17 Immunity in

- 637 Chlamydial Lung Infection. *Mol. Med.* 20: 109–119.
- 638 57. Aujla, S. J., and J. K. Kolls. 2009. IL-22: a critical mediator in mucosal host defense. *J.*  
639 *Mol. Med.* 87: 451–4.
- 640 58. Dhiman, R., M. Indramohan, P. F. Barnes, R. C. Nayak, P. Paidipally, L. V. M. Rao, and  
641 R. Vankayalapati. 2009. IL-22 produced by human NK cells inhibits growth of  
642 *Mycobacterium tuberculosis* by enhancing phagolysosomal fusion. *J. Immunol.* 183: 6639–  
643 45.
- 644 59. Zeng, G., C. Y. Chen, D. Huang, S. Yao, R. C. Wang, and Z. W. Chen. 2011. Membrane-  
645 bound IL-22 after de novo production in tuberculosis and anti-*Mycobacterium tuberculosis*  
646 effector function of IL-22+ CD4+ T cells. *J. Immunol.* 187: 190–9.
- 647 60. Dhiman, R., S. Venkatasubramanian, P. Paidipally, P. F. Barnes, A. Tvinnereim, and R.  
648 Vankayalapati. 2014. Interleukin 22 inhibits intracellular growth of *Mycobacterium*  
649 *tuberculosis* by enhancing calgranulin A expression. *J. Infect. Dis.* 209: 578–87.
- 650 61. Brenchley, J. M., M. Paiardini, K. S. Knox, A. I. Asher, B. Cervasi, T. E. Asher, P.  
651 Scheinberg, D. A. Price, C. A. Hage, L. M. Kholi, A. Khoruts, I. Frank, J. Else, T. Schacker,  
652 G. Silvestri, and D. C. Douek. 2008. Differential Th17 CD4 T-cell depletion in pathogenic  
653 and nonpathogenic lentiviral infections. *Blood* 112: 2826–35.
- 654 62. Klatt, N. R., and J. M. Brenchley. 2010. Th17 cell dynamics in HIV infection. *Curr.*  
655 *Opin. HIV AIDS* 5: 135–40.
- 656 63. Page, E. E., L. Greathead, R. Metcalf, S.-A. Clark, M. Hart, D. Fuchs, P. Pantelidis, F.  
657 Gotch, A. Pozniak, M. Nelson, A. Boasso, B. Gazzard, and P. Kelleher. 2014. Loss of Th22  
658 Cells Is Associated With Increased Immune Activation and IDO-1 Activity in HIV-1  
659 Infection. *J. Acquir. Immune Defic. Syndr.* 67: 227–35.
- 660 64. Ryan, E. S., L. Micci, R. Fromentin, S. Paganini, C. S. McGary, K. Easley, N. Chomont,  
661 and M. Paiardini. 2016. Loss of Function of Intestinal IL-17 and IL-22 Producing Cells

662 Contributes to Inflammation and Viral Persistence in SIV-Infected Rhesus Macaques. *PLoS*  
663 *Pathog.* 12: 1–22.

664 65. Gosselin, A., P. Monteiro, N. Chomont, F. Diaz-Griffero, E. A. Said, S. Fonseca, V.  
665 Wacleche, M. El-Far, M.-R. Boulassel, J.-P. Routy, R.-P. Sekaly, and P. Ancuta. 2010.  
666 Peripheral Blood CCR4+CCR6+ and CXCR3+CCR6+ CD4+ T Cells Are Highly Permissive  
667 to HIV-1 Infection. *J. Immunol.* 184: 1604–1616.

668 66. Gosselin, A., T. R. Wiche Salinas, D. Planas, V. S. Wacleche, Y. Zhang, R. Fromentin,  
669 N. Chomont, É. A. Cohen, B. Shacklett, V. Mehraj, M. P. Ghali, J.-P. Routy, and P. Ancuta.  
670 2017. HIV persists in CCR6+CD4+ T-cells from colon and blood during antiretroviral  
671 therapy. *AIDS* 31: 35–38.

672 67. Monteiro, P., A. Gosselin, V. S. Wacleche, M. El-Far, E. A. Said, H. Kared, N.  
673 Grandvaux, M.-R. Boulassel, J.-P. Routy, and P. Ancuta. 2011. Memory CCR6+CD4+ T  
674 Cells Are Preferential Targets for Productive HIV Type 1 Infection Regardless of Their  
675 Expression of Integrin  $\beta 7$ . *J. Immunol.* 186: 4618–4630.

676 68. Alvarez, Y., M. Tuen, G. Shen, F. Nawaz, J. Arthos, M. J. Wolff, M. A. Poles, and C. E.  
677 Hioe. 2013. Preferential HIV Infection of CCR6+ Th17 Cells Is Associated with Higher  
678 Levels of Virus Receptor Expression and Lack of CCR5 Ligands. *J. Virol.* 87: 10843–10854.

679 69. Bernier, A., A. Cleret-Buhot, Y. Zhang, J. P. Goulet, P. Monteiro, A. Gosselin, S.  
680 DaFonseca, V. S. Wacleche, M. A. Jenabian, J. P. Routy, C. Tremblay, and P. Ancuta. 2013.  
681 Transcriptional profiling reveals molecular signatures associated with HIV permissiveness in  
682 Th1Th17 cells and identifies peroxisome proliferator-activated receptor gamma as an  
683 intrinsic negative regulator of viral replication. *Retrovirology* 10: 160.

684 70. Cleret-Buhot, A., Y. Zhang, D. Planas, J. P. Goulet, P. Monteiro, A. Gosselin, V. S.  
685 Wacleche, C. L. Tremblay, M. A. Jenabian, J. P. Routy, M. El-Far, N. Chomont, E. K.  
686 Haddad, R. P. Sekaly, and P. Ancuta. 2015. Identification of novel HIV-1 dependency factors

687 in primary CCR4 + CCR6 + Th17 cells via a genome-wide transcriptional approach.

688 *Retrovirology* 12: 1–23.

689 71. Planas, D., Y. Zhang, P. Monteiro, J. Goulet, A. Gosselin, N. Grandvaux, T. J. Hope, A.

690 Fassati, J. Routy, and P. Ancuta. 2017. HIV-1 selectively targets gut-homing CCR6+CD4+ T

691 cells via mTOR-dependent mechanisms. *JCI insight* 2: 1–21.

692 72. Favre, D., J. Mold, P. W. Hunt, B. Kanwar, P. Loke, L. Seu, J. D. Barbour, M. M. Lowe,

693 A. Jayawardene, F. Aweeka, Y. Huang, D. C. Douek, J. M. Brenchley, J. N. Martin, F. M.

694 Hecht, S. G. Deeks, and J. M. McCune. 2010. Tryptophan catabolism by indoleamine 2,3-

695 dioxygenase 1 alters the balance of TH17 to regulatory T cells in HIV disease. *Sci. Transl.*

696 *Med.* 2: 32ra36.

697 73. Klatt, N. R., J. D. Estes, X. Sun, A. M. Ortiz, J. S. Barber, L. D. Harris, B. Cervasi, L. K.

698 Yokomizo, L. Pan, C. L. Vinton, B. Tabb, L. A. Canary, Q. Dang, V. M. Hirsch, G. Alter, Y.

699 Belkaid, J. D. Lifson, G. Silvestri, J. D. Milner, M. Paiardini, E. K. Haddad, and J. M.

700 Brenchley. 2012. Loss of mucosal CD103+ DCs and IL-17+ and IL-22+ lymphocytes is

701 associated with mucosal damage in SIV infection. *Mucosal Immunol.* 5: 646–657.

702 74. Sonnenberg, G. F., M. G. Nair, T. J. Kirn, C. Zaph, L. A. Fouser, and D. Artis. 2010.

703 Pathological versus protective functions of IL-22 in airway inflammation are regulated by IL-

704 17A. *J. Exp. Med.* 207: 1293–1305.

705

706 **Table**

707 Table 1: Characteristics of study participants

| <b>HIV-uninfected (n=25)</b> |                                             | <b>HIV-infected (n=25)</b> |                                             |                                       |
|------------------------------|---------------------------------------------|----------------------------|---------------------------------------------|---------------------------------------|
| <b>PID</b>                   | <b>CD4 count<br/>(cells/mm<sup>3</sup>)</b> | <b>PID</b>                 | <b>CD4 count<br/>(cells/mm<sup>3</sup>)</b> | <b>Viral Load<br/>(RNA copies/ml)</b> |
| 1032                         | ND                                          | 1086                       | 1449                                        | 4250                                  |
| 1035                         | 1459                                        | 1151                       | 988                                         | 1848                                  |
| 1052                         | 1412                                        | 1075                       | 965                                         | 5922                                  |
| 1031                         | 1169                                        | 1150                       | 894                                         | 311                                   |
| 1023                         | 1120                                        | 1006                       | 802                                         | 4141                                  |
| 1070                         | 1028                                        | 1039                       | 790                                         | 4521                                  |
| 1024                         | 939                                         | 1080                       | 774                                         | 14100                                 |
| 1025                         | 915                                         | 1152                       | 749                                         | <40                                   |
| 1057                         | 871                                         | 1154                       | 714                                         | 2954                                  |
| 1058                         | 866                                         | 1018                       | 681                                         | 4614                                  |
| 1054                         | 832                                         | 1143                       | 656                                         | 618                                   |
| 1094                         | 827                                         | 1073                       | 632                                         | 12274                                 |
| 1028                         | 814                                         | 1084                       | 619                                         | 9192                                  |
| 1033                         | 813                                         | 1134                       | 599                                         | 6383                                  |
| 1011                         | 801                                         | 1079                       | 591                                         | 32485                                 |
| 1095                         | 760                                         | 1153                       | 571                                         | 9697                                  |
| 1038                         | 743                                         | 1137                       | 560                                         | 18797                                 |
| 1072                         | 741                                         | 1141                       | 552                                         | 9826                                  |
| 1047                         | 680                                         | 1076                       | 543                                         | 908                                   |
| 1061                         | 674                                         | 1045                       | 522                                         | 59125                                 |
| 1015                         | 659                                         | 1129                       | 510                                         | 4559                                  |
| 1049                         | 655                                         | 1074                       | 478                                         | 10093                                 |
| 1001                         | 631                                         | 1142                       | 441                                         | 544849                                |
| 1066                         | 621                                         | 1126                       | 433                                         | 32994                                 |
| 1010                         | 580                                         | 1020                       | 406                                         | 31145                                 |
| <b>Median</b>                | 813                                         |                            | 619                                         | 6383                                  |
| <b>IQR</b>                   | 675.5-933                                   |                            | 532.5-782                                   | 3548-16449                            |

708

709

710

711 **FIGURE LEGENDS**

712

713 **Figure 1: CD4+ T cell cytokine responses to mycobacterial antigens in latent TB**

714 **infection.** (A) Representative flow cytometry plots of the production of IFN- $\gamma$ , IL-22 and IL-  
715 17 from CD4+ T cells after stimulation with *M. bovis* BCG, *M.tb* PPD and ESAT-6/CFP-10  
716 peptides, in one study participant. UNS corresponds to the unstimulated control. The  
717 frequency of cytokine-producing cells is shown as a percentage of the total CD4+ T cell  
718 population, after gating on live, CD3+ lymphocytes. (B) Individual IFN- $\gamma$  (blue), IL-22 (red)  
719 or IL-17 (green) responses to BCG, PPD or ESAT-6/CFP-10 (n=25). The frequency of  
720 cytokine-producing cells is shown as a percentage of the total CD4+ T cell population, after  
721 gating on live, CD3+ lymphocytes. Each dot represents one individual. Data are shown as  
722 box and whisker (interquartile range) plots and horizontal bars represent the median.  
723 Statistical comparisons were performed using a Kruskal-Wallis and Dunn's multiple  
724 comparison test. \*p $\leq$ 0.05, \*\*p $\leq$ 0.01, \*\*\*p $\leq$ 0.001, \*\*\*\*p $\leq$ 0.0001

725

726 **Figure 2: The relationship between IL-22, and other cytokines produced in response to**

727 **BCG.** (A) The relationship between the frequency of CD4+ T cells producing IFN- $\gamma$  and IL-  
728 22 in response to BCG (n=24). Each dot represents an individual. Statistical analyses were  
729 performed using a non-parametric Spearman rank correlation. (B) Populations of CD4+ T  
730 cells producing different combinations of IFN- $\gamma$ , IL-22 and IL-17 in response to BCG. The  
731 pie charts indicate the proportion of cytokine combinations that makes up the BCG response.  
732 Each slice of the pie represents a specific subset of cells, defined by a combination of  
733 cytokines shown by the color at the bottom of the graphs. Data are shown as box and whisker  
734 (interquartile range) plots and horizontal bars represent the median.

735



736 **Figure 3: Memory profiles of CD4+ T cells producing IFN- $\gamma$ , IL-22 or IL-17 in**  
737 **response to BCG. (A)** Representative flow cytometry plots of total CD4+ memory subset  
738 distribution in one individual based on CD45RO and CD27 staining. Naïve: CD45RO-  
739 CD27+, early differentiated (ED: CD45RO+CD27+), late differentiated (LD:  
740 CD45RO+CD27-) and terminally differentiated (TD: CD45RO-CD27-). The overlays  
741 indicate the antigen specific CD4+ T cells producing IFN- $\gamma$  (blue), IL-22 (red) or IL-17  
742 (green). The frequencies of each subset are indicated. **(B)** The memory distribution of cells  
743 producing IFN- $\gamma$  (blue), IL-22 (red) or IL-17 (green) in response to BCG (n=20, 25 and 7,  
744 respectively). Only individuals with a positive cytokine response and more than 30 cytokine  
745 events were included in the phenotyping. Each dot represents one individual. Data are shown  
746 as box and whisker (interquartile range) plots and horizontal bars represent the median.  
747 Statistical comparisons were performed using a Kruskal-Wallis and Dunn's multiple  
748 comparison test.

749

750 **Figure 4: Chemokine receptor expression of CD4+ T cells producing IFN- $\gamma$ , IL-22 or**  
751 **IL-17 in response to *M.tb* whole cell lysate. (A)** Representative flow cytometry plots of the  
752 expression of CCR6, CCR4, CXCR3 and CCR10 on total CD4+ T cells in one individual.  
753 The overlays indicate the antigen specific CD4+ T cells producing IFN- $\gamma$  (blue), IL-22 (red)  
754 or IL-17 (green). The frequencies of each subset are indicated. **(B)** The chemokine receptor  
755 distribution of cells producing IFN- $\gamma$  (blue), IL-22 (red) or IL-17 (green) in response to *M.tb*  
756 lysate (n=19, 19 and 11, respectively). Only individuals with a positive cytokine response and  
757 more than 30 cytokine events were included in the phenotyping. Each dot represents one  
758 individual. Data are shown as box and whisker (interquartile range) plots and horizontal bars  
759 represent the median. Statistical comparisons were performed using a Kruskal-Wallis and  
760 Dunn's multiple comparison test. \*p $\leq$ 0.05, \*\*p $\leq$ 0.01, \*\*\*p $\leq$ 0.001, \*\*\*\*p $\leq$ 0.0001

761

762 **Figure 5: CD4+ T cell responses to BCG in HIV-infected and uninfected individuals. (A)**

763 The individual IFN- $\gamma$ , IL-22 or IL-17 responses in HIV uninfected or infected individuals in  
764 response to BCG (n=24 in each group). **(B)** The cytokine frequency adjusted for CD4 count  
765 in HIV-infected and HIV-uninfected individuals in response to BCG. **(C)** The median  
766 fluorescent intensity (MFI) of IFN- $\gamma$  in response to BCG (n=24 and n=15 for HIV-uninfected  
767 and infected, respectively) The MFI of IL-22 in response to BCG (n=23 and n=20 for HIV-  
768 uninfected and infected, respectively) The MFI of IL-17 in response to BCG (n=22 and n=8  
769 for HIV-uninfected and infected, respectively). For each cytokine, MFI was only graphed for  
770 individuals with positive cytokine responses. HIV-uninfected participants are shown with  
771 open circles and HIV-uninfected individuals with closed circles. Each dot represents one  
772 individual. Data are shown as box and whisker (interquartile range) plots and horizontal bars  
773 represent the median. Statistical comparisons were performed using a non-parametric Mann  
774 Whitney test. \* $p \leq 0.05$ , \*\* $p \leq 0.01$ , \*\*\* $p \leq 0.001$ , \*\*\*\* $p \leq 0.0001$

775

776 **Figure 6: The relationship between clinical parameters and IFN- $\gamma$ , IL-22 or IL-17 CD4+**

777 **T cell responses to BCG in HIV-infected individuals.** The association between IFN- $\gamma$   
778 (blue), IL-22 (red) or IL-17 (green) responses to BCG and **(A)** CD4 count or **(B)** viral load.  
779 Each dot represents an individual (n=24). The dotted line indicates linear regression for  
780 statistically significant correlations, highlighted in bold. Statistical analyses were performed  
781 using a non-parametric Spearman rank correlation.

782

783 **Supplemental Figure S1: Cytokine responses to BCG and *M.tb* whole cell lysate.**

784 Comparison of the frequencies of CD4+ T cells producing IFN- $\gamma$ , IL-17 and IL-22 in  
785 response to BCG (circles) and *M.tb* whole cell lysate (triangles) in healthy donors (n=8). The

786 frequency of cytokine-producing cells is shown as a percentage of the total CD4<sup>+</sup> T cell  
787 population, after gating on live, CD3<sup>+</sup> lymphocytes. Statistical comparisons were performed  
788 using a non-parametric matched pairs Wilcoxon test.

789

790 **Supplemental Figure S2: Phenotypic profiles of Th subsets.** (A) The chemokine receptor  
791 distribution of cells co-producing IFN- $\gamma$  and IL-22 (n=14) in response to *M.tb* lysate.  
792 Horizontal bars represent the median. (B) KLRG1 and CD26 expression on *M.tb*-specific  
793 Th1, Th22 and Th17 cells. Representative overlay plots showing KLRG1 and CD26  
794 expression on total CD4<sup>+</sup> T cells (grey), IFN- $\gamma$ <sup>+</sup> (blue), IL-22<sup>+</sup> (red) and IL-17<sup>+</sup> (green) cells  
795 in response to *M.tb* lysate (top panel). Expression of KLRG1 and CD26 shown as box and  
796 whisker (interquartile range) plots (bottom panel) and horizontal bars represent the median  
797 (n=19). Statistical comparisons were performed using a Kruskal-Wallis and Dunn's multiple  
798 comparison test. Only individuals with a positive cytokine response and more than 30  
799 cytokine events were included in the phenotyping. Each dot represents one individual.

800

801 **Supplemental Figure S3: CD4<sup>+</sup> T cell responses to PPD in HIV-infected and uninfected**  
802 **individuals.** (A) The individual IFN- $\gamma$ , IL-22 or IL-17 responses in HIV uninfected (n=25) or  
803 infected individuals (n=24) in response to PPD. (B) The cytokine frequency adjusted for CD4  
804 count in HIV-infected and HIV-uninfected individuals in response to PPD. (C) The median  
805 fluorescent intensity (MFI) of IFN- $\gamma$  in response to PPD (n=25 and n=24 for HIV-uninfected  
806 and infected, respectively). The MFI of IL-22 in response to PPD (n=21 and n=18 for HIV-  
807 uninfected and infected, respectively). The MFI of IL-17 in response to PPD (n=12 and n=12  
808 for HIV-uninfected and infected, respectively). For each cytokine, MFI was only plotted for  
809 individuals with positive cytokine response. HIV-uninfected participants are shown with  
810 open circles and HIV-uninfected individuals with closed circles. Each dot represents one

811 individual. Data are shown as box and whisker (interquartile range) plots and horizontal bars  
812 represent the median. Statistical comparisons were performed using a non-parametric Mann  
813 Whitney test.

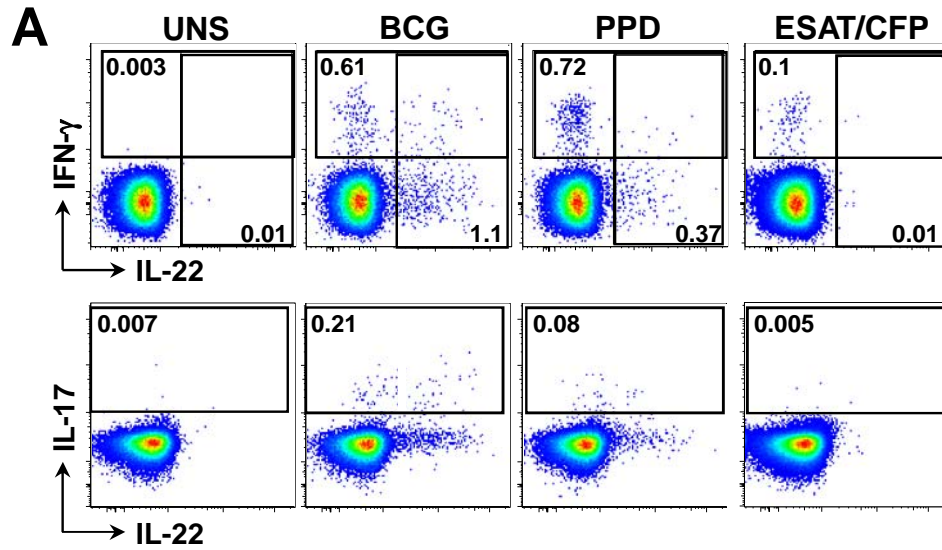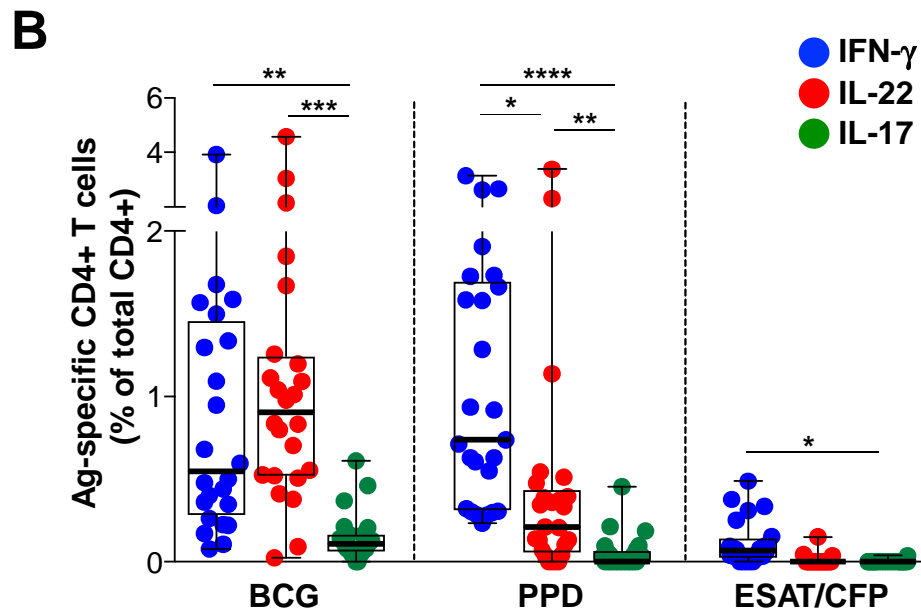

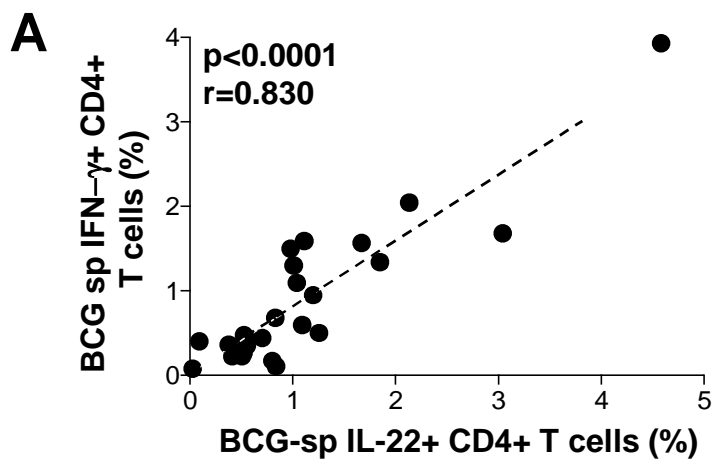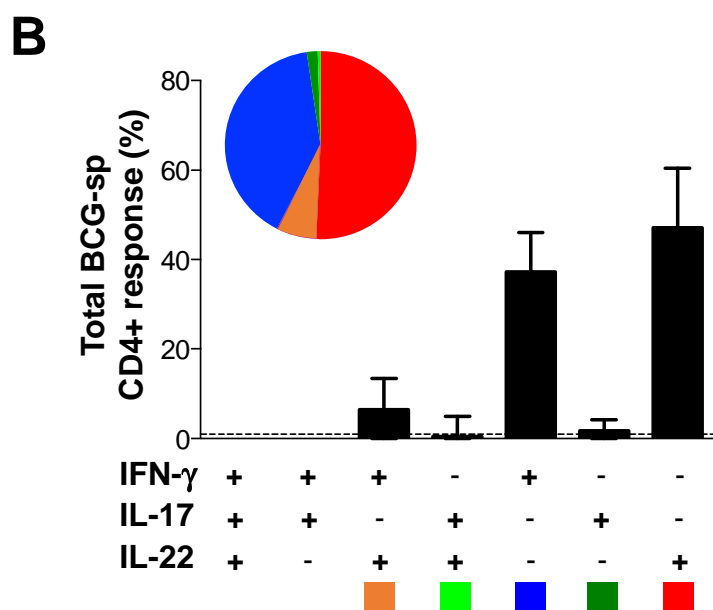

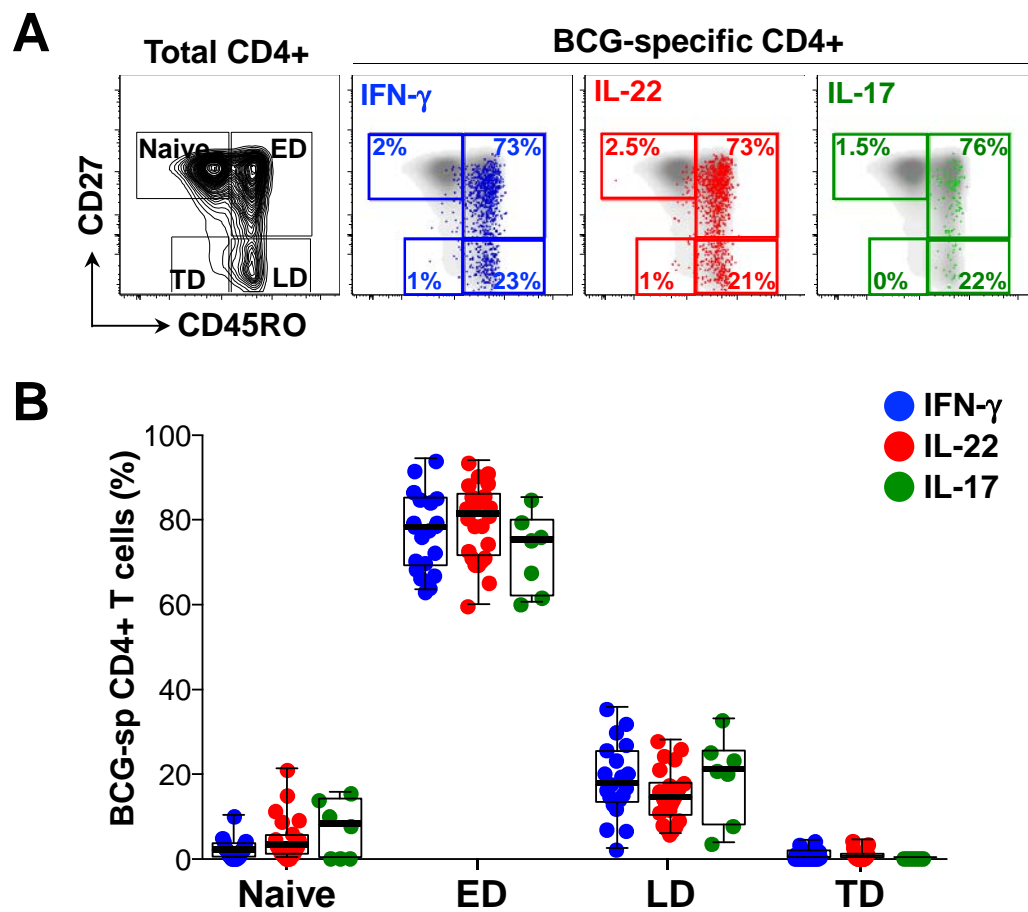

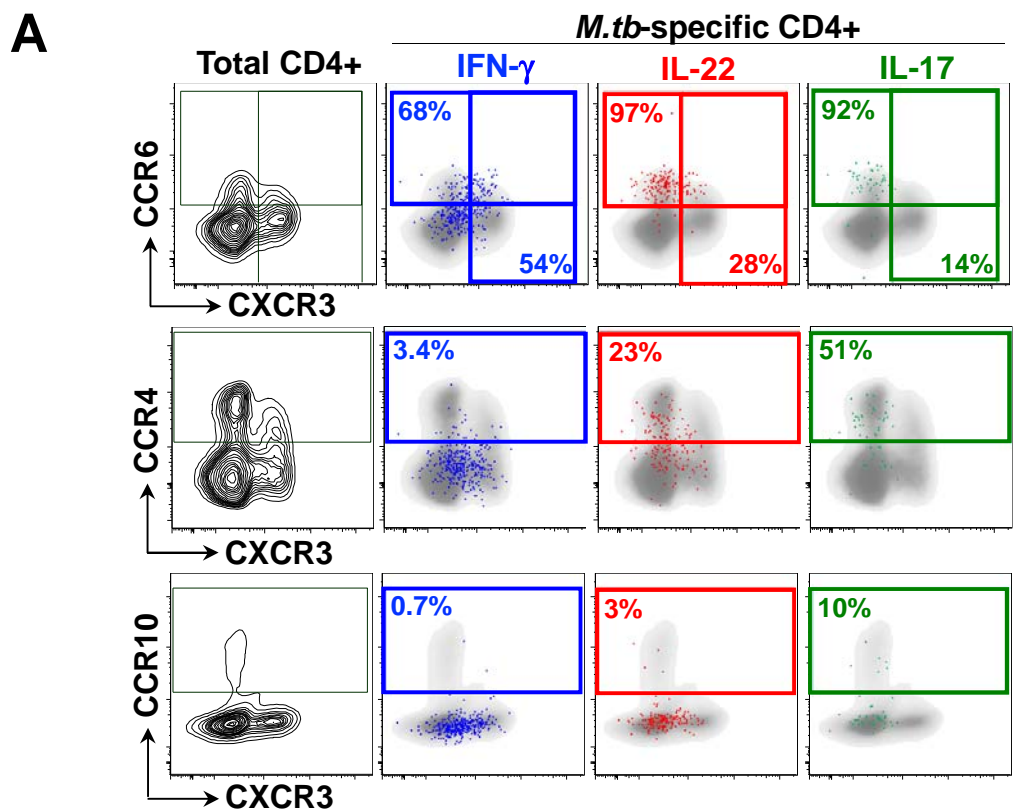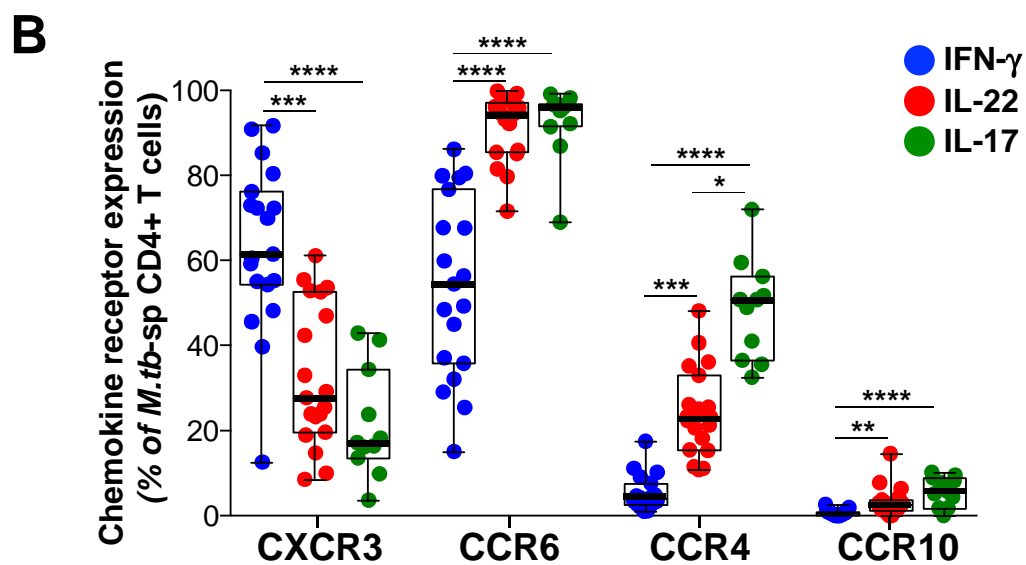



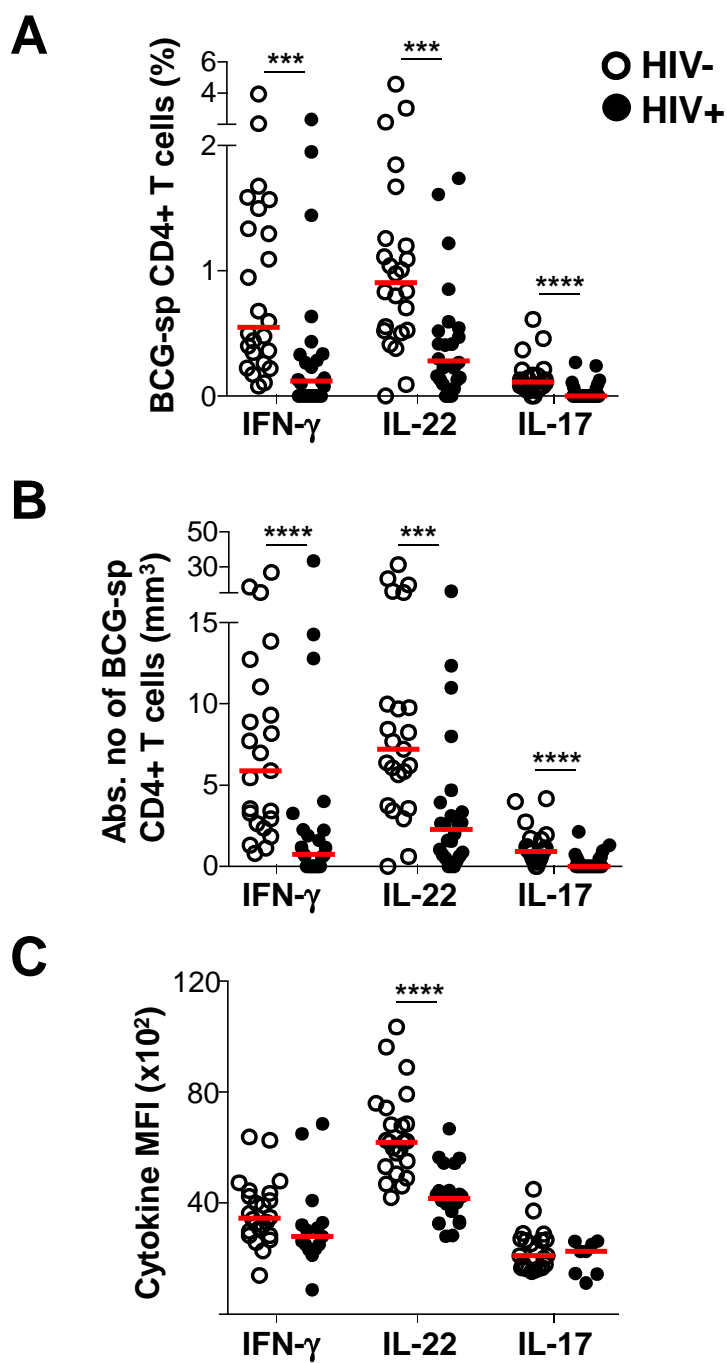

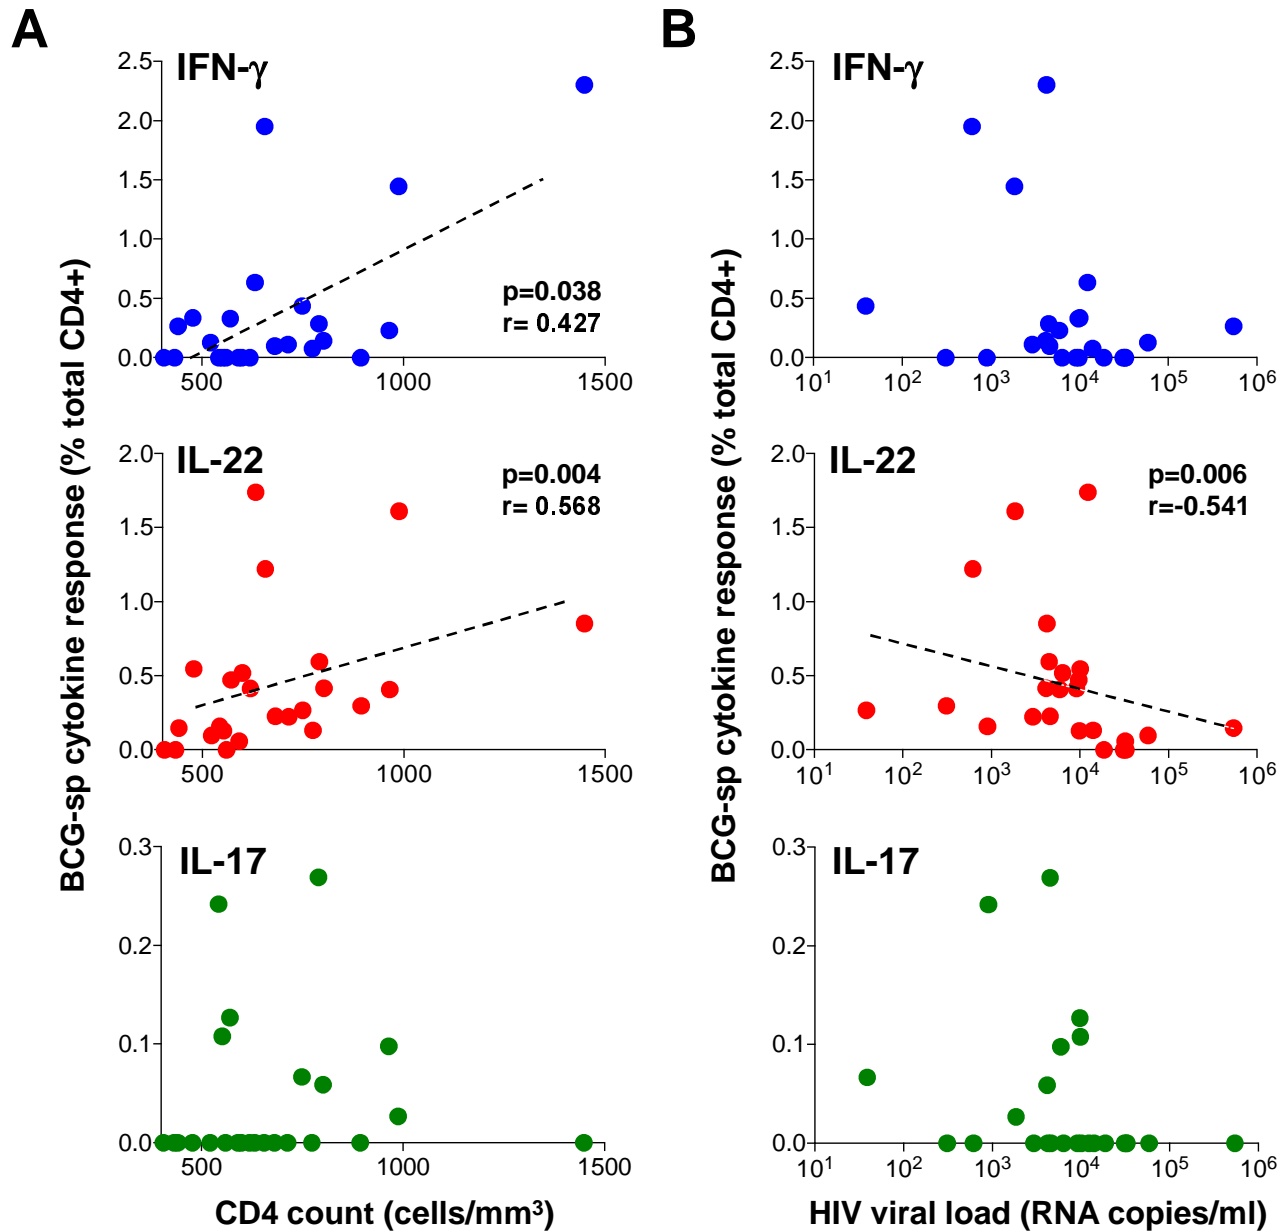

Source: https://www.biorxiv.org/content/10.1101/732263v1.full.pdf
